# Supplementary material
Source: publisher figshare collection journal article supplement (https://acs.figshare.com/ndownloader/files/15177653)
Supplement: Supplementary file 1 [file 15177653]

# Supplementary Information for Optical Properties of $\text{In}_{2x}\text{Ga}_{2-2x}\text{O}_3$ Nanowires Revealed by Photoacoustic Spectroscopy

Szymon J. Zelewski,<sup>\*,‡</sup> Ziyao Zhou,<sup>¶,§</sup> Fangzhou Li,<sup>¶</sup> Xiaolin Kang,<sup>¶</sup> You Meng,<sup>¶</sup> Johnny C. Ho,<sup>\*,¶,§</sup>  
and Robert Kudrawiec<sup>\*,‡</sup>

<sup>‡</sup> *Faculty of Fundamental Problems of Technology, Wrocław University of Science and Technology,  
Wybrzeże Wyspiańskiego 27, 50-370 Wrocław, Poland*

<sup>¶</sup> *Department of Materials Science and Engineering, City University of Hong Kong, 83 Tat Chee  
Avenue, Kowloon, Hong Kong SAR, P. R. China*

<sup>§</sup> *Shenzhen Research Institute, City University of Hong Kong, Shenzhen 518057, P. R. China*

Corresponding E-mail: [szymon.zelewski@pwr.edu.pl](mailto:szymon.zelewski@pwr.edu.pl); [johnnyho@cityu.edu.hk](mailto:johnnyho@cityu.edu.hk);  
[robert.kudrawiec@pwr.edu.pl](mailto:robert.kudrawiec@pwr.edu.pl)

Keywords:  $\text{In}_2\text{O}_3$ ,  $\text{Ga}_2\text{O}_3$ ,  $\text{InGaO}$ , nanowire, photoacoustic spectroscopy

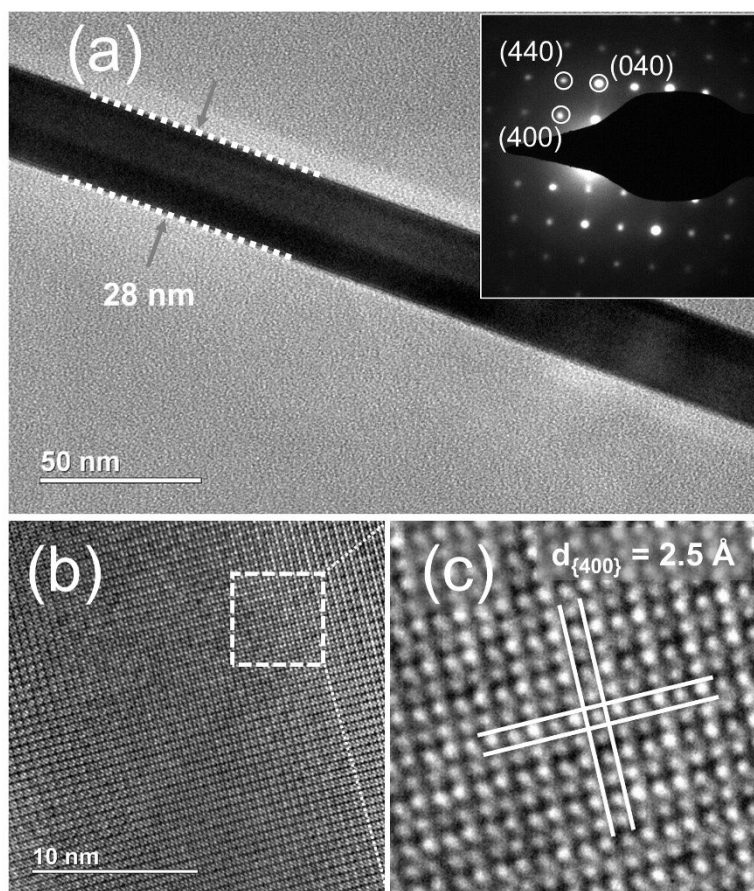

Figure S1. (a) TEM image and (inset) the corresponding SAED patterns of  $\text{In}_{1.8}\text{Ga}_{0.2}\text{O}_3$  NWs. (b) and (c) HRTEM images of  $\text{In}_{1.8}\text{Ga}_{0.2}\text{O}_3$  NWs.

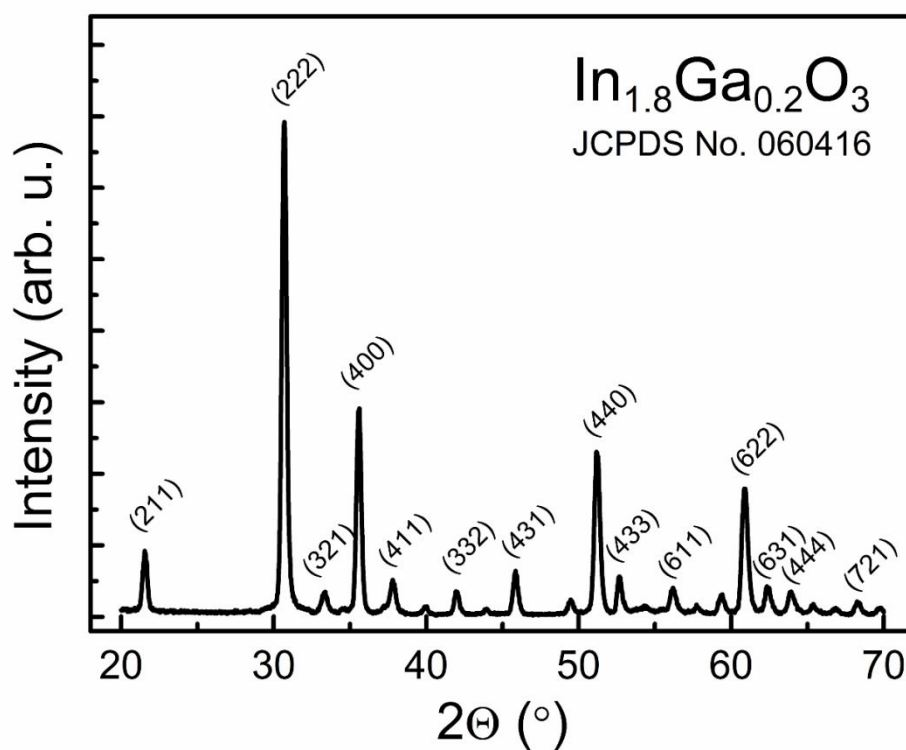

Figure S2. XRD patterns of the obtained  $\text{In}_{1.8}\text{Ga}_{0.2}\text{O}_3$  NWs.

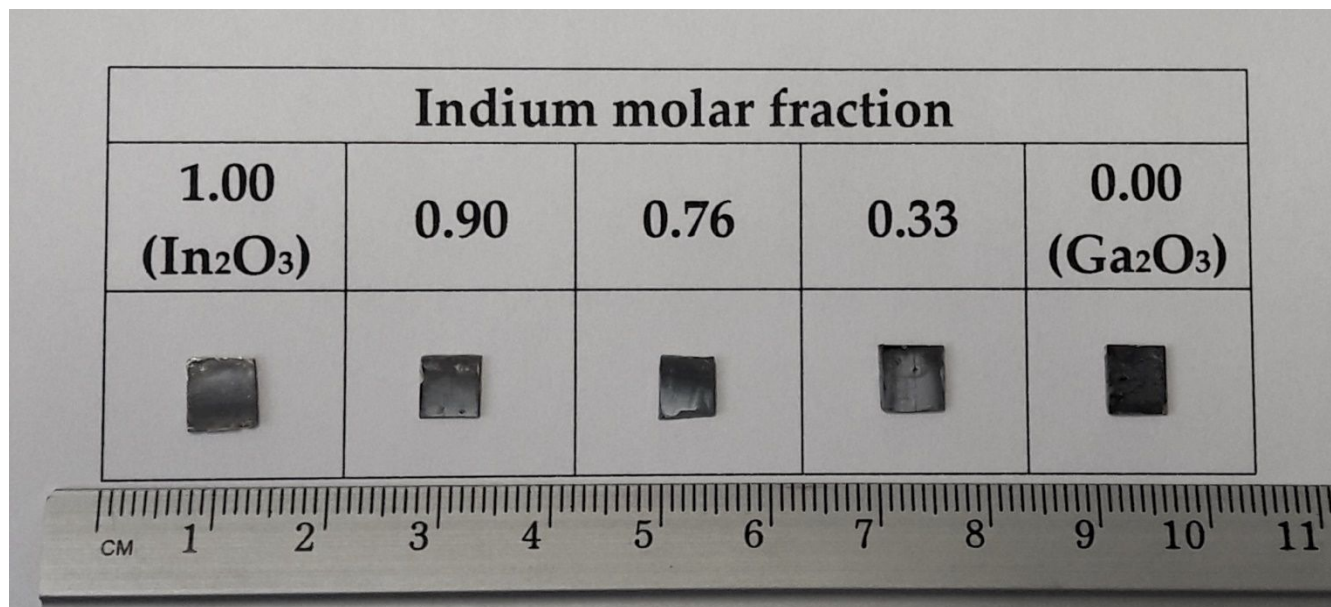

Figure S3. Photograph of the In<sub>2</sub>O<sub>3</sub>, Ga<sub>2</sub>O<sub>3</sub>, and mixed In<sub>2x</sub>Ga<sub>2-2x</sub>O<sub>3</sub> samples.

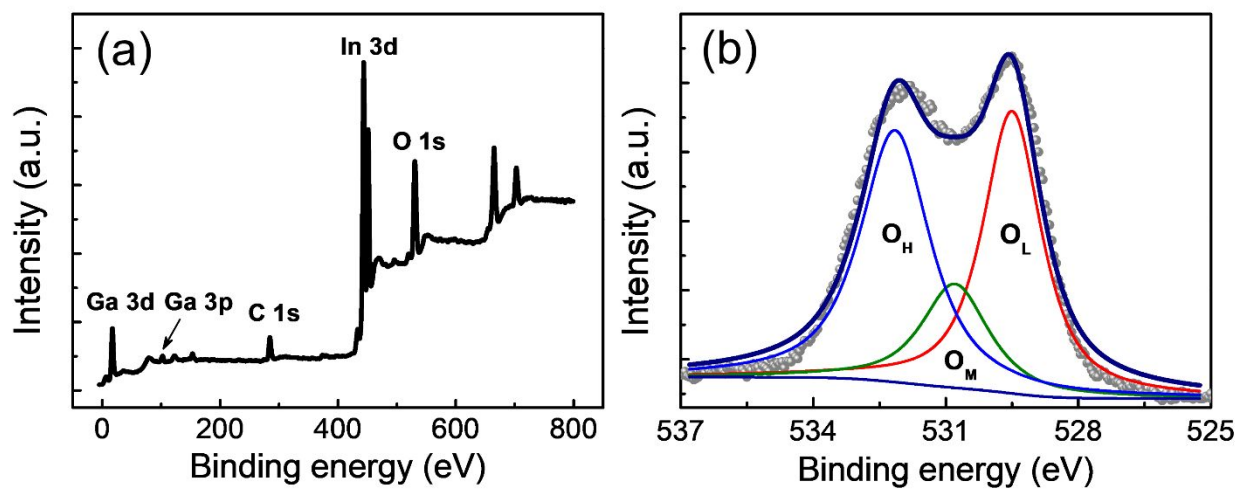

Figure S4. (a) XPS wide scans and (b) O 1s peak analysis of In<sub>1.8</sub>Ga<sub>0.2</sub>O<sub>3</sub> NWs.
